# Supplementary material for: Transcriptional alterations reveal Bacillus amyloliquefaciens-rice cooperation under salt stress
Source: PubMed Central journal article supplement (PMC6695486; doi:10.1038/s41598-019-48309-8), 2019-08-15
Supplement: 41598_2019_48309_MOESM1_ESM.pdf [file 41598_2019_48309_MOESM1_ESM.pdf]

**Transcriptional alterations reveal *Bacillus amyloliquefaciens*-rice cooperation under salt stress**

**Puneet Singh Chauhan<sup>1,2#</sup>, Charu Lata<sup>1,2#</sup>, Shalini Tiwari<sup>1</sup>, Abhishek Singh Chauhan<sup>1,2</sup>, Shashank Kumar Mishra<sup>1,2</sup>, Lalit Agrawal<sup>1</sup>, Debasis Chakrabarty<sup>1,2</sup>, Chandra Shekhar Nautiyal<sup>1\*</sup>**

<sup>1</sup>*CSIR-National Botanical Research Institute, Rana Pratap Marg, Lucknow 226001, India*

<sup>2</sup>*Academy of Scientific and Innovative Research (AcSIR), 2 Rafi Marg, New Delhi 110001, India*

**#Authors contributed equally as first author**

**Correspondence may be addressed to**

Dr. Chandra Shekhar Nautiyal

Division of Plant Microbe Interactions

CSIR-National Botanical Research Institute

Rana Pratap Marg, Lucknow 226 001, India

E-mail: csnbri@yahoo.com

Phone: +91-522-2205848

Fax: +91-522-2205839

**Fig. S1:** Phenotype of rice seedlings exposed to salt stress in the presence and absence of SN13.

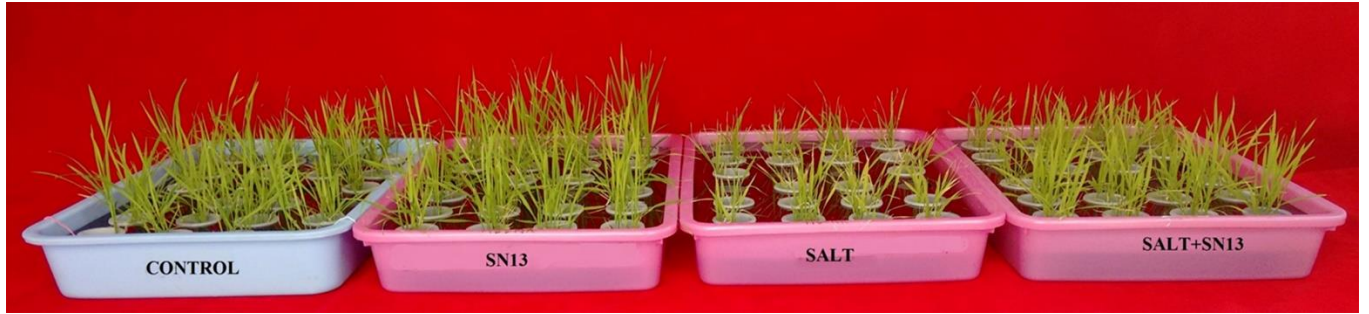

**Fig. S2:** Blast2GO term assignment of the differential expressed genes in different categories of biological process (a), cellular function (b) and molecular component (c)

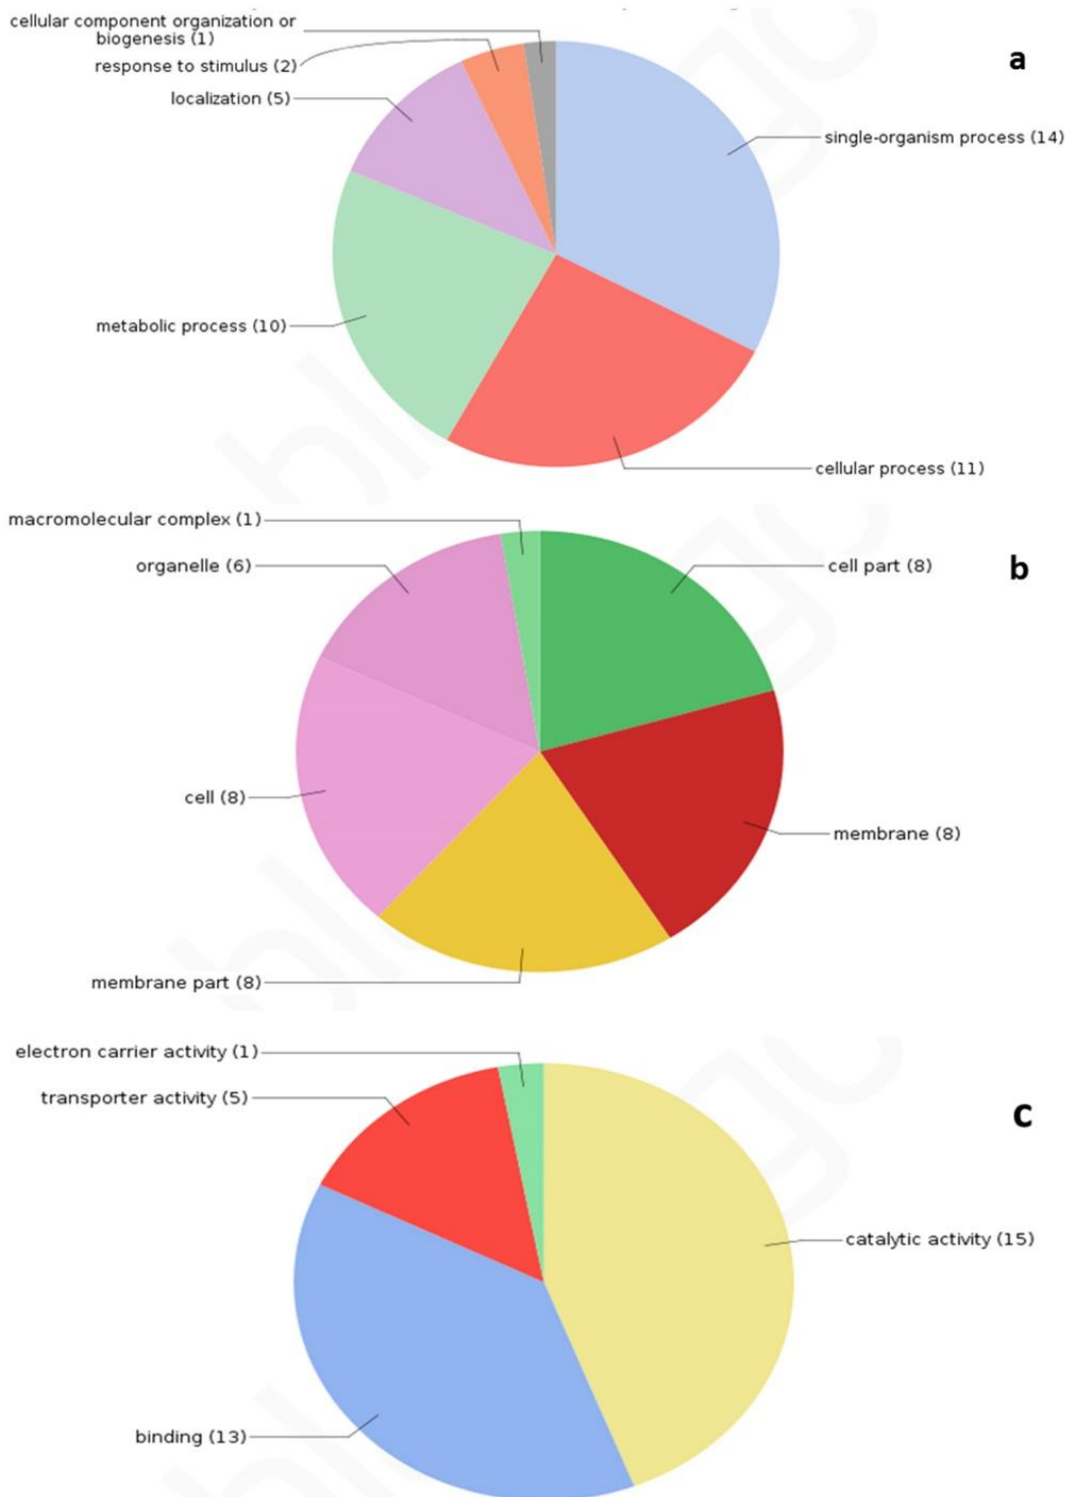

**Fig. S3:** MapMan visualization for observed differential expression patterns of transcripts involved in metabolic and regulatory pathways in salt (a,b) and SN13 (c,d) treatments.

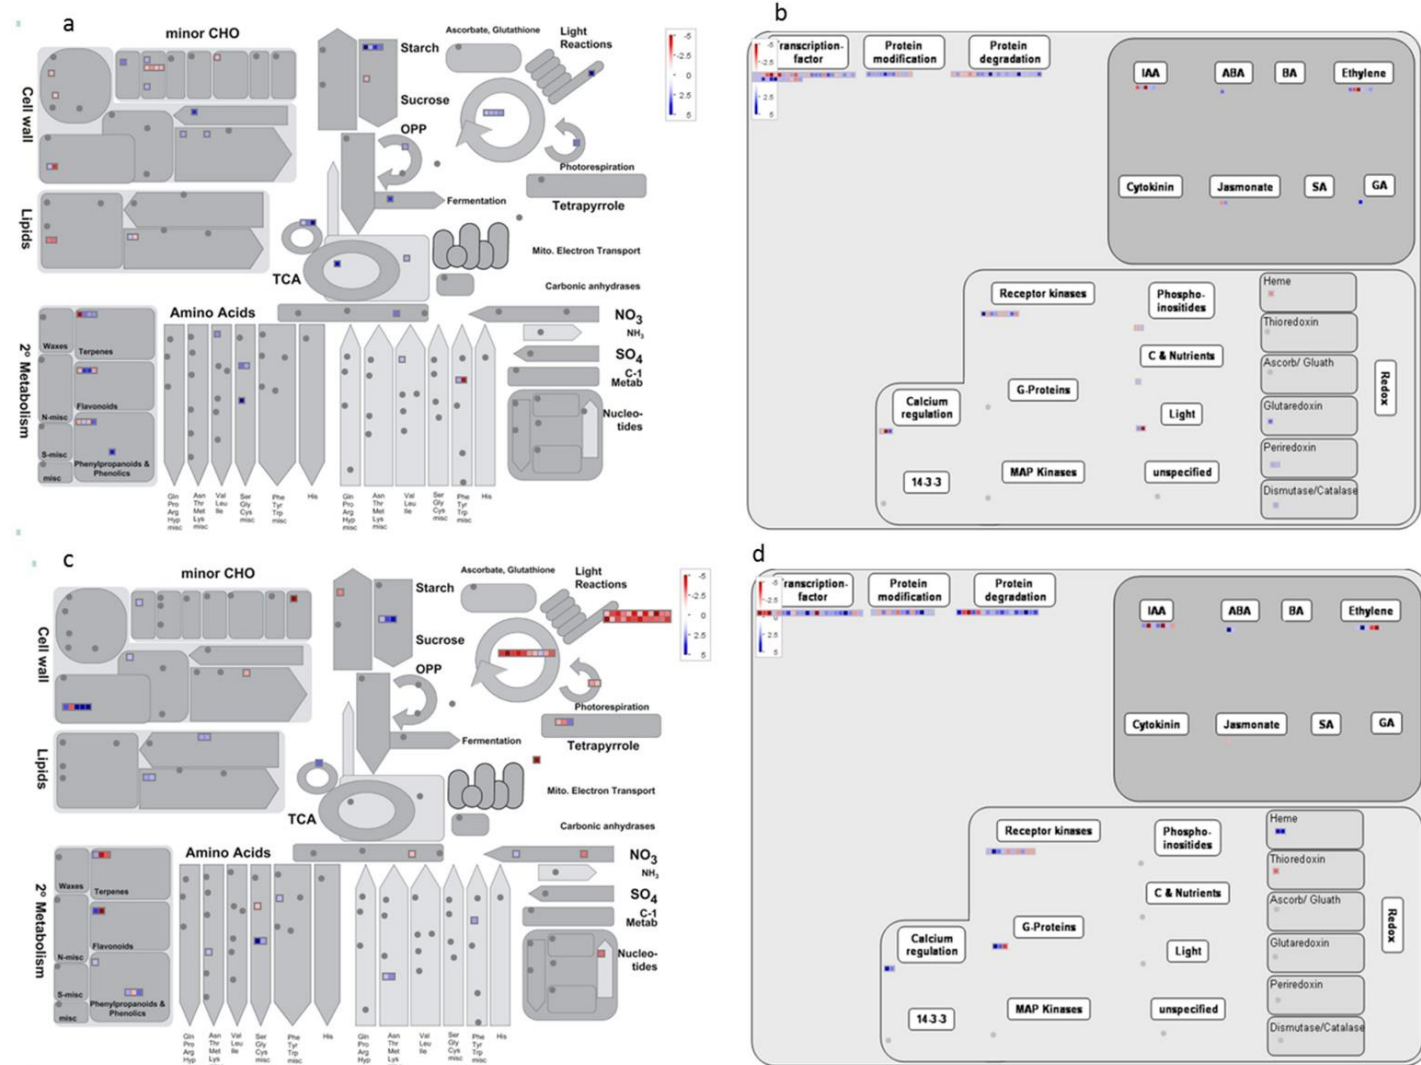

**Fig. S4:** A heat map showing under and over represented functional classifications among genes which were differentially regulated. This analysis was performed using the PageMan software package. Red boxes indicate that genes in a category were generally down-regulated while blue boxes indicate that genes in a category were generally up-regulated in the corresponding set of samples relative to controls.

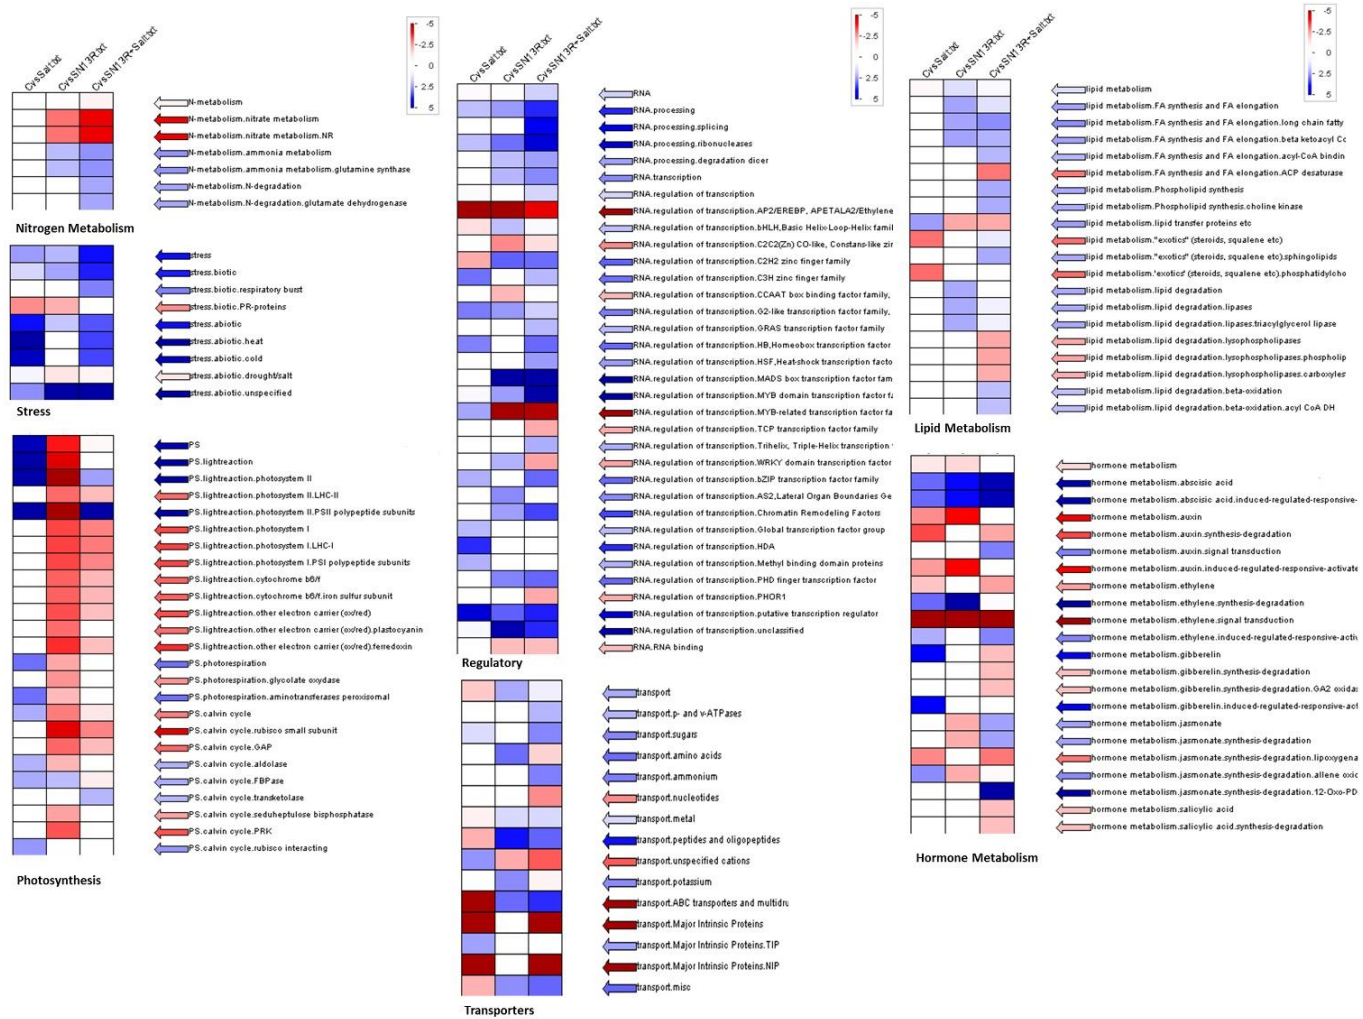

**Table S1:** List of primers used in the study

| Gene(s)                | Description | Accession no.* | Primer Sequence                                                     | Amplicon Length |
|------------------------|-------------|----------------|---------------------------------------------------------------------|-----------------|
| <i>DEF</i>             | qRT-PCR     | LOC_Os03g03810 | F-5' C TTCACGCAAGGTGTTCTC 3'<br>R-5' C TTGAACCGGTGGCTCT 3'          | 125             |
| <i>DHN</i>             | "           | LOC_Os11g26750 | F-5' G CAACAAGGGCAACAAC 3'<br>R-5' G GTGGCGATCTTGGTATC 3'           | 98              |
| <i>USP</i>             | "           | LOC_Os05g28740 | F-5' G AGCCATGGTTACGGTTTC 3'<br>R-5' C CTCTTGACGACGACGA 3'          | 97              |
| <i>GSTU6</i>           | "           | LOC_Os10g38600 | F-5' G CCTACGTCACCAGAGT 3'<br>R-5' G AGGAGTCGCTCTTGTT 3'            | 92              |
| <i>LEA</i>             | "           | LOC_Os05g46480 | F-5' T TCCTCGGCGAGAAGAC 3'<br>R-5' G GCAGAGTCCTTGGTGTA 3'           | 105             |
| <i>Myb</i>             | "           | LOC_Os02g04640 | F-5' G TCTGAACAGCTCGGAATTG 3'<br>R-5' G CAAGATGACACTGGAAGAG 3'      | 106             |
| <i>Myb</i>             | "           | LOC_Os04g56990 | F-5' C AACAGCATCAGGACAGAAT 3'<br>R-5' C TTGAGGTGGAACGAGTG 3'        | 97              |
| <i>bZIP</i>            | "           | LOC_Os06g41770 | F- 5' C GACGAGTCCGCCATATTTA 3'<br>R- 5' G TCGGCGAAGAACTCTACAT 3'    | 103             |
| <i>HLH</i>             | "           | LOC_Os03g26210 | F- 5' G AGAGGGAGAAGCTTAAACG 3'<br>R- 5' G GGTGGTGTCACTTAGTATG 3'    | 115             |
| <i>Splicing Factor</i> | "           | LOC_Os01g03060 | F- 5' C TCAGACTCAAGCGATGATAC 3'<br>R-5' G ATGCTTTCTCCTGTGTGAG 3'    | 95              |
| <i>Protein kinase</i>  | "           | LOC_Os09g39650 | F- 5' A CGATGATGTTCTTGCTGGTGT 3'<br>R-5' T GACATGCTCCTTGAACCAATG 3' | 83              |

|                                     |                     |                |                                                                                                                                     |      |
|-------------------------------------|---------------------|----------------|-------------------------------------------------------------------------------------------------------------------------------------|------|
| <i>UBQ</i>                          | ”                   | LOC_Os09g31031 | F- 5' TCACCACTGCCGCAAGAAG 3'<br>R-5' GCTATCGAAAGCGAGTTGATGAA 3'                                                                     | 81   |
| <i>Ca-EF hand</i>                   | ”                   | LOC_Os03g14590 | F- 5' CTGAGCAACATCGCTGAAAGG 3'<br>R-5' GTTCTCGGTGTGTGCGACAA 3'                                                                      | 60   |
| <i>NAM</i>                          | ”                   | LOC_Os11g03370 | F-5' CAGATGCGGAGGTAATCTTG 3'<br>R-5' CATGGCTCGCACTTGTT 3'                                                                           | 103  |
| <i>NAM</i>                          | ”                   | LOC_Os05g10620 | F-5' CACTTCAGCTCAGCTCCTACCAA 3'<br>R-5' AGTGGTGACCCCGATCAACTT 3'                                                                    | 79   |
| <i>Aldo/keto reductase</i>          | ”                   | LOC_Os04g27060 | F-5' TTCCGCAAGAGCCTACCTAGATT 3'<br>R-5' CCATGGCATTAACTTCTCGAA 3'                                                                    | 79   |
| <i>GRAM domain</i>                  | ”                   | LOC_Os03g08860 | F-5' CAGGTGGTTTCCGTTGATAA 3'<br>R-5' GAAGTGCTTCCTGCAGATT 3'                                                                         | 88   |
| <i>PBI</i>                          | ”                   | LOC_Os11g25780 | F-5' CTGTACCACCGTCAGACT 3'<br>R-5' GTTGTGATGCTGCTGCTG 3'                                                                            | 108  |
| <i>Cyt. P450</i>                    | ”                   | LOC_Os01g43750 | F-5' CCGTAACCTTCACTCGAAAG 3'<br>R-5' TGGGTTCATGGTGTATGAGTA 3'                                                                       | 107  |
| <i>Cystein proteinase inhibitor</i> | ”                   | LOC_Os05g41460 | F- 5' AATAAGCTGTACGAGGCCAAGGT 3'<br>R- 5' TGAATCCTGGAGCTGCTTGA 3'                                                                   | 67   |
| <i>UGE</i>                          | ”                   | LOC_Os09g35800 | F- 5'GGAGATTGCACTGAGGTTT 3'<br>R- 5' CCTGCACATGTCTCTATTTC 3'                                                                        | 90   |
| <i>POP9</i>                         | ”                   | LOC_Os04g47360 | F- 5' GCTTGTGCAGTCCATGGTGATA 3'<br>R-5' CAAGCTCCTCATCTGCAAGACA 3'                                                                   | 78   |
| <i>NSHB</i>                         | ”                   | LOC_Os03g12510 | F- 5' CATTGGACTCCGTTCTTCTTG 3'<br>R-5' AGTTGCGCAGGAACGAGAAC 3'                                                                      | 77   |
| <i>Metal transporter</i>            | ”                   | LOC_Os07g15460 | F- 5' CTACTTCTCAGCACAAAGC 3'<br>R-5' TTCCTGAACGTCAGGTAGAT 3'                                                                        | 138  |
| <i>Actin</i>                        | ”                   | LOC_Os11g06390 | F-5' CGGTGTGATGGTTGGTATG 3'<br>R-5' ATGCTCGATCGGGTACTT 3'                                                                           | 97   |
| <i>OsNAM</i>                        | Full length cloning |                | F1-5' GCATGGTGGAGACTAGTACA 3'<br>R1-5' GCACTAGCTATTACGATGAGTC3'<br>F2-5' ATGGTGGAGACTAGTACATCC3'<br>R2-5' GCTATTACGATGAGTCCCATAG 3' | 1080 |
| <i>OsGRAM</i>                       | ”                   |                | F1-5' TCCCCGCCGTCGACATGCAC3'<br>R1-5' CTATGGACATCACTAAGCTCGTAG 3'<br>F2-5' ACATGCACCCGCCGCCG3'<br>R2-5' CTAAGCTCGTAGATTCTGAGCCTCC3' | 795  |
| OsNAM_BamHI_F<br>OsNAM_XbaI_R       | Yeast cloning       | -              | F-5'CGGGATCCCGATGGTGGAGACTAGTACATCC 3'<br>R-5' GCTCTAGAGCGCTATTACGATGAGTCCCATAG 3'                                                  |      |
| OsGRAM_BamHI_F<br>OsGRAM_XbaI_R     | .                   | -              | F-5'CGGGATCCCGACATGCACCCGCCGCCG3'<br>R-5'GCTCTAGAGCTAAGCTCGTAGATTCTGAGCCTCC3'                                                       |      |
| M13                                 | Sequencing          | -              | F-5'CGCCAGGGTTTTCCAGTCACGAC3'<br>R-5'TCACACAGGAAACAGCTATGAC3'                                                                       | -    |

\*The Institute of Genomic Research (TIGR)-Rice Genome Annotation Project locus ID.

**Table S2:** Effect of NBRI-SN13 on the growth parameters of rice cultivars subjected to salt stress.

| Treatments | Shoot length (cm.) | Root Length (cm.) | Fresh weight (mg.) | Dry weight (mg.) |
|------------|--------------------|-------------------|--------------------|------------------|
| Control    | 16.25±1.7 b        | 6.48±1.25 a       | 116.35±14.9 c      | 5.55±1.20 a      |
| SN13       | 17.45±0.98 b       | 8.00±0.67 b       | 223.00±13.8 d      | 10.53±1.28 b     |
| Salt       | 8.58±0.85 a        | 7.65±0.73 ab      | 57.23±5.0 a        | 5.73±0.59 a      |
| Salt+SN13  | 9.25±0.47 a        | 6.43±0.72 a       | 75.98±9.7 b        | 7.28±1.40 a      |

**Table S3:** A NGSQCTOOL kit result for control, salt, SN13, salt+SN13 samples.

| File name                       | Control_1.fq | Control_2.fq | Control_1.fq_<br>filtered | Control_2.fq_<br>filtered |
|---------------------------------|--------------|--------------|---------------------------|---------------------------|
| Minimum read length             | 100          | 100          | 100                       | 100                       |
| Maximum read length             | 100          | 100          | 100                       | 100                       |
| Average read length             | 100          | 100          | 100                       | 100                       |
| Total number of reads           | 16568439     | 16568439     | 16568439                  | 16568439                  |
| Total number of reads with non- | 24027        | 2287         | 24027                     | 2287                      |

|                                           |                       |                       |                                |                                |
|-------------------------------------------|-----------------------|-----------------------|--------------------------------|--------------------------------|
| ATGC bases                                |                       |                       |                                |                                |
| Percentage of reads with non-ATGC bases   | 0.15%                 | 0.01%                 | 0.15%                          | 0.01%                          |
| Total number of bases                     | 1656843900            | 1656843900            | 1656843900                     | 1656843900                     |
| Total number of HQ bases                  | 1637763602            | 1633570766            | 1637763602                     | 1633570766                     |
| Percentage of HQ bases                    | 98.85%                | 98.60%                | 98.85%                         | 98.60%                         |
| Total number of non-ATGC bases            | 24669                 | 3760                  | 24669                          | 3760                           |
| Percentage of non-ATGC bases              | 0.00%                 | 0.00%                 | 0.00%                          | 0.00%                          |
| <b>File name</b>                          | <b>Salt_1.fq</b>      | <b>Salt_2.fq</b>      | <b>Salt_1.fq_filtered</b>      | <b>Salt_2.fq_filtered</b>      |
| Minimum read length                       | 100                   | 100                   | 100                            | 100                            |
| Maximum read length                       | 100                   | 100                   | 100                            | 100                            |
| Average read length                       | 100                   | 100                   | 100                            | 100                            |
| Total number of reads                     | 23387476              | 23387476              | 23387476                       | 23387476                       |
| Total number of reads with non-ATGC bases | 34117                 | 3333                  | 34117                          | 3333                           |
| Percentage of reads with non-ATGC bases   | 0.15%                 | 0.01%                 | 0.15%                          | 0.01%                          |
| Total number of bases                     | 2338747600            | 2338747600            | 2338747600                     | 2338747600                     |
| Total number of HQ bases                  | 2312807360            | 2305168395            | 2312807360                     | 2305168395                     |
| Percentage of HQ bases                    | 98.89%                | 98.56%                | 98.89%                         | 98.56%                         |
| Total number of non-ATGC bases            | 34958                 | 5374                  | 34958                          | 5374                           |
| Percentage of non-ATGC bases              | 0.00%                 | 0.00%                 | 0.00%                          | 0.00%                          |
| <b>File name</b>                          | <b>SN13_1.fq</b>      | <b>SN13_2.fq</b>      | <b>SN13_1.fq_filtered</b>      | <b>SN13_2.fq_filtered</b>      |
| Minimum read length                       | 100                   | 100                   | 100                            | 100                            |
| Maximum read length                       | 100                   | 100                   | 100                            | 100                            |
| Average read length                       | 100                   | 100                   | 100                            | 100                            |
| Total number of reads                     | 17739411              | 17739411              | 17739411                       | 17739411                       |
| Total number of reads with non-ATGC bases | 26065                 | 2505                  | 26065                          | 2505                           |
| Percentage of reads with non-ATGC bases   | 0.15%                 | 0.01%                 | 0.15%                          | 0.01%                          |
| Total number of bases                     | 1773941100            | 1773941100            | 1773941100                     | 1773941100                     |
| Total number of HQ bases                  | 1754884582            | 1749699923            | 1754884582                     | 1749699923                     |
| Percentage of HQ bases                    | 98.93%                | 98.63%                | 98.93%                         | 98.63%                         |
| Total number of non-ATGC bases            | 26703                 | 4184                  | 26703                          | 4184                           |
| Percentage of non-ATGC bases              | 0.00%                 | 0.00%                 | 0.00%                          | 0.00%                          |
| <b>File name</b>                          | <b>SN13+Salt_1.fq</b> | <b>SN13+Salt_2.fq</b> | <b>SN13+Salt_1.fq_filtered</b> | <b>SN13+Salt_2.fq_filtered</b> |
| Minimum read length                       | 100                   | 100                   | 100                            | 100                            |
| Maximum read                              | 100                   | 100                   | 100                            | 100                            |

|                                           |            |            |            |            |
|-------------------------------------------|------------|------------|------------|------------|
| length                                    |            |            |            |            |
| Average read length                       | 100        | 100        | 100        | 100        |
| Total number of reads                     | 24147409   | 24147409   | 24147409   | 24147409   |
| Total number of reads with non-ATGC bases | 35741      | 3466       | 35741      | 3466       |
| Percentage of reads with non-ATGC bases   | 0.15%      | 0.01%      | 0.15%      | 0.01%      |
| Total number of bases                     | 2414740900 | 2414740900 | 2414740900 | 2414740900 |
| Total number of HQ bases                  | 2388732530 | 2382207391 | 2388732530 | 2382207391 |
| Percentage of HQ bases                    | 98.92%     | 98.65%     | 98.92%     | 98.65%     |
| Total number of non-ATGC bases            | 36664      | 5768       | 36664      | 5768       |
| Percentage of non-ATGC bases              | 0.00%      | 0.00%      | 0.00%      | 0.00%      |

**Table S4:** TopHat Alignment Summary for control, salt, SN13, salt+SN13 samples.

| Samples       | Left Reads |                     |                    | Right Reads |                     |                    |
|---------------|------------|---------------------|--------------------|-------------|---------------------|--------------------|
|               | HQ Reads   | Aligned Reads       | Unaligned Reads    | HQ Reads    | Aligned Reads       | Unaligned Reads    |
| Control       | 16568439   | 14176033<br>(85.6%) | 2392406<br>(14.4%) | 16568439    | 14145712<br>(85.4%) | 2422727<br>(14.6%) |
| Salt          | 23387476   | 19811116<br>(84.7%) | 3576360<br>(15.3%) | 23387476    | 19761936<br>(84.5%) | 3625540<br>(15.5%) |
| SN13          | 17739411   | 15616276 (88%)      | 2123135<br>(11.9%) | 17739411    | 15584732<br>(87.9%) | 2154679<br>(12.1%) |
| SN13+<br>Salt | 24147409   | 20070035<br>(83.1%) | 4077374<br>(16.9%) | 24147409    | 20029887<br>(82.9%) | 4117522 (17%)      |
